# Supplementary material for: The Recombinant Protein EphB4-Fc Changes the Ti Particle-Mediated Imbalance of OPG/RANKL via EphrinB2/EphB4 Signaling Pathway and Inhibits the Release of Proinflammatory Factors In Vivo
Source: Hindawi journal article supplement (doi:10.1155/2020/1404915), 2020-06-06
Supplement: f1 [file 1404915.f1.pdf]

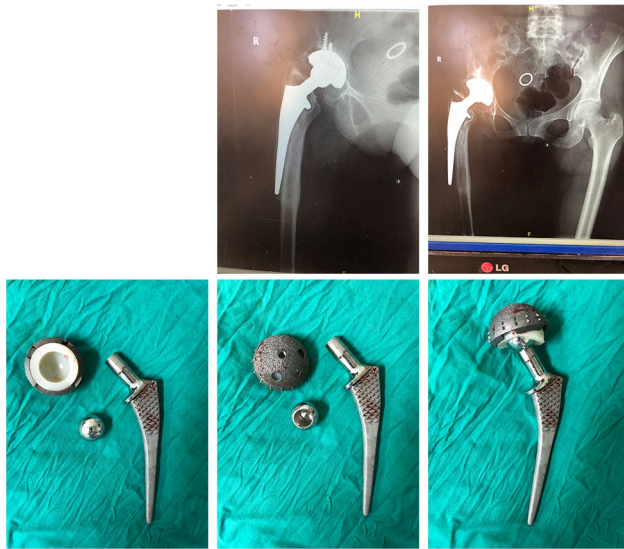

Supplementary Figure. S1.Preoperative X-ray and postoperative prosthesis pictures.

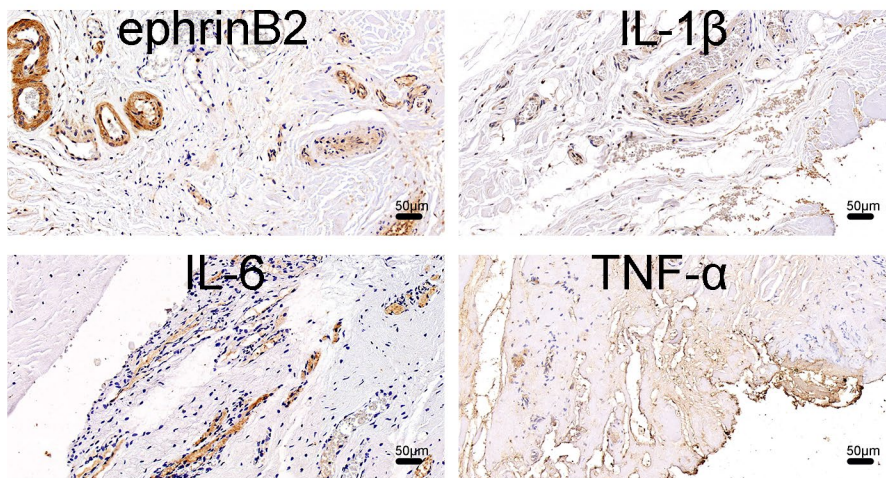

Supplementary Figure. S2.Immunohistochemistry of the interface membrane.

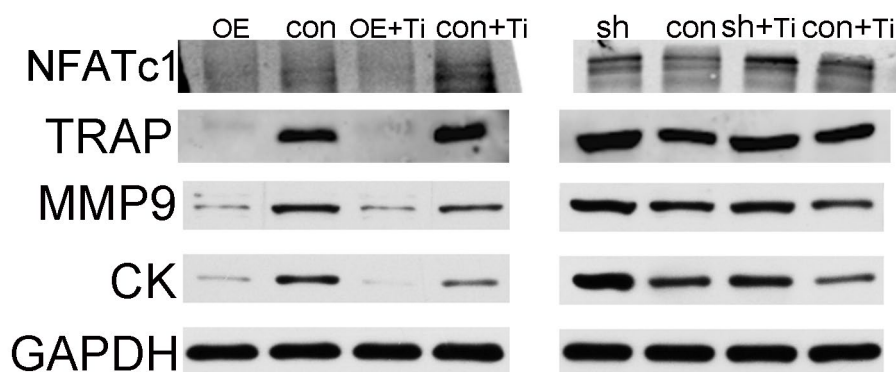

Supplementary Figure. S3.Functionalization of osteoclast differentiation after over-expression and silencing of Raw264.7 cells was verified by western blot.

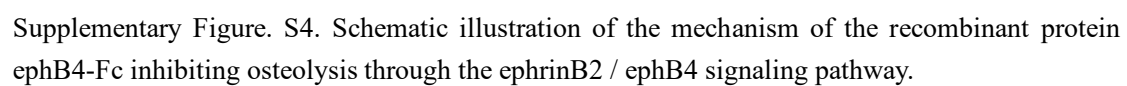

Supplementary Figure. S4. Schematic illustration of the mechanism of the recombinant protein ephB4-Fc inhibiting osteolysis through the ephrinB2 / ephB4 signaling pathway.
